# Supplementary material for: Immunosuppressive FK506 treatment leads to more frequent EBV-associated lymphoproliferative disease in humanized mice
Source: PubMed Central journal article supplement (PMC7162544; doi:10.1371/journal.ppat.1008477), 2020-04-06
Supplement: ppat.1008477.s002.pdf [file ppat.1008477.s002.pdf]

## S1 Table. Curated gene set list for GSEA.

Collection      Molecular Signatures Database Gene Set Name

|    |                                                 |
|----|-------------------------------------------------|
| C2 | ABRAHAM_ALPC_VS_MULTIPLE_MYELOMA_DN             |
| C2 | ABRAHAM_ALPC_VS_MULTIPLE_MYELOMA_UP             |
| C2 | ACOSTA_PROLIFERATION_INDEPENDENT_MYC_TARGETS_DN |
| C2 | ACOSTA_PROLIFERATION_INDEPENDENT_MYC_TARGETS_UP |
| C2 | ALCALA_APOPTOSIS                                |
| C2 | BASSO_B_LYMPHOCYTE_NETWORK                      |
| C2 | BASSO_CD40_SIGNALING_DN                         |
| C2 | BASSO_CD40_SIGNALING_UP                         |
| C2 | BASSO_HAIRY_CELL_LEUKEMIA_DN                    |
| C2 | BASSO_HAIRY_CELL_LEUKEMIA_UP                    |
| C2 | BILBAN_B_CLL_LPL_DN                             |
| C2 | BILBAN_B_CLL_LPL_UP                             |
| C2 | BILD_MYC_ONCOGENIC_SIGNATURE                    |
| C2 | BIOCARTA_ASBCCELL_PATHWAY                       |
| C2 | BIOCARTA_BCELLSURVIVAL_PATHWAY                  |
| C2 | BIOCARTA_BCR_PATHWAY                            |
| C2 | BIOCARTA_BLYMPHOCYTE_PATHWAY                    |
| C2 | BIOCARTA_CASPASE_PATHWAY                        |
| C2 | BIOCARTA_CELLCYCLE_PATHWAY                      |
| C2 | BIOCARTA_CHEMICAL_PATHWAY                       |
| C2 | BIOCARTA_DEATH_PATHWAY                          |
| C2 | BIOCARTA_DNAFRAGMENT_PATHWAY                    |
| C2 | BIOCARTA_FREE_PATHWAY                           |
| C2 | BIOCARTA_G1_PATHWAY                             |
| C2 | BIOCARTA_G2_PATHWAY                             |
| C2 | BIOCARTA_IGF1R_PATHWAY                          |
| C2 | BIOCARTA_MITOCHONDRIA_PATHWAY                   |
| C2 | BIOCARTA_P27_PATHWAY                            |
| C2 | BIOCARTA_PTC1_PATHWAY                           |
| C2 | BIOCARTA_PTEN_PATHWAY                           |
| C2 | BIOCARTA_RANMS_PATHWAY                          |
| C2 | BIOCARTA_SET_PATHWAY                            |
| C2 | BIOCARTA_TALL1_PATHWAY                          |
| C2 | BOHN_PRIMARY_IMMUNODEFICIENCY_SYNDROM_DN        |

|    |                                                  |
|----|--------------------------------------------------|
| C2 | BOHN_PRIMARY_IMMUNODEFICIENCY_SYNDROM_UP         |
| C2 | BROCKE_APOPTOSIS_REVERSED_BY_IL6                 |
| C2 | CEBALLOS_TARGETS_OF_TP53_AND_MYC_DN              |
| C2 | CEBALLOS_TARGETS_OF_TP53_AND_MYC_UP              |
| C2 | DANG_BOUND_BY_MYC                                |
| C2 | DANG_MYC_TARGETS_DN                              |
| C2 | DANG_MYC_TARGETS_UP                              |
| C2 | DANG_REGULATED_BY_MYC_DN                         |
| C2 | DANG_REGULATED_BY_MYC_UP                         |
| C2 | DIRMEIER_LMP1_RESPONSE_EARLY                     |
| C2 | DIRMEIER_LMP1_RESPONSE_LATE_DN                   |
| C2 | DIRMEIER_LMP1_RESPONSE_LATE_UP                   |
| C2 | DORSEY_GAB2_TARGETS                              |
| C2 | DUTTA_APOPTOSIS_VIA_NFKB                         |
| C2 | EGUCHI_CELL_CYCLE_RB1_TARGETS                    |
| C2 | EHRlich_ICF_SYNDROM_DN                           |
| C2 | EHRlich_ICF_SYNDROM_UP                           |
| C2 | FAELT_B_CLL_WITH_VH_REARRANGEMENTS_DN            |
| C2 | FAELT_B_CLL_WITH_VH_REARRANGEMENTS_UP            |
| C2 | FAELT_B_CLL_WITH_VH3_21_DN                       |
| C2 | FAELT_B_CLL_WITH_VH3_21_UP                       |
| C2 | FERNANDEZ_BOUND_BY_MYC                           |
| C2 | FLECHNER_PBL_KIDNEY_TRANSPLANT_OK_VS_DONOR_DN    |
| C2 | FLECHNER_PBL_KIDNEY_TRANSPLANT_OK_VS_DONOR_UP    |
| C2 | FLECHNER_PBL_KIDNEY_TRANSPLANT_REJECTED_VS_OK_DN |
| C2 | FLECHNER_PBL_KIDNEY_TRANSPLANT_REJECTED_VS_OK_UP |
| C2 | GARY_CD5_TARGETS_DN                              |
| C2 | GARY_CD5_TARGETS_UP                              |
| C2 | GOTTWEIN_TARGETS_OF_KSHV_MIR_K12_11              |
| C2 | GUTIERREZ_CHRONIC_LYMPHOCYTIC_LEUKEMIA_DN        |
| C2 | GUTIERREZ_CHRONIC_LYMPHOCYTIC_LEUKEMIA_UP        |
| C2 | GUTIERREZ_MULTIPLE_MYELOMA_UP                    |
| C2 | GUTIERREZ_WALDENSTROEMS_MACROGLOBULINEMIA_1_DN   |
| C2 | GUTIERREZ_WALDENSTROEMS_MACROGLOBULINEMIA_1_UP   |
| C2 | GUTIERREZ_WALDENSTROEMS_MACROGLOBULINEMIA_2      |
| C2 | HADDAD_B_LYMPHOCYTE_PROGENITOR                   |

|    |                                            |
|----|--------------------------------------------|
| C2 | HASLINGER_B_CLL_WITH_11Q23_DELETION        |
| C2 | HASLINGER_B_CLL_WITH_13Q14_DELETION        |
| C2 | HASLINGER_B_CLL_WITH_17P13_DELETION        |
| C2 | HASLINGER_B_CLL_WITH_6Q21_DELETION         |
| C2 | HASLINGER_B_CLL_WITH_CHROMOSOME_12_TRISOMY |
| C2 | HASLINGER_B_CLL_WITH_MUTATED_VH_GENES      |
| C2 | HOEGERKORP_CD44_TARGETS_DIRECT_DN          |
| C2 | HOEGERKORP_CD44_TARGETS_DIRECT_UP          |
| C2 | HOEGERKORP_CD44_TARGETS_TEMPORAL_DN        |
| C2 | HOEGERKORP_CD44_TARGETS_TEMPORAL_UP        |
| C2 | HOFMANN_CELL_LYMPHOMA_DN                   |
| C2 | HOFMANN_CELL_LYMPHOMA_UP                   |
| C2 | HOLLMANN_APOPTOSIS_VIA_CD40_DN             |
| C2 | HOLLMANN_APOPTOSIS_VIA_CD40_UP             |
| C2 | HUMMEL_BURKITT'S_LYMPHOMA_DN               |
| C2 | HUMMEL_BURKITT'S_LYMPHOMA_UP               |
| C2 | HUTTMANN_B_CLL_POOR_SURVIVAL_DN            |
| C2 | HUTTMANN_B_CLL_POOR_SURVIVAL_UP            |
| C2 | JAIN_NFKB_SIGNALING                        |
| C2 | KEGG_APOPTOSIS                             |
| C2 | KEGG_B_CELL_RECEPTOR_SIGNALING_PATHWAY     |
| C2 | KEGG_CELL_CYCLE                            |
| C2 | KLEIN_PRIMARY EFFUSION_LYMPHOMA_DN         |
| C2 | KLEIN_PRIMARY EFFUSION_LYMPHOMA_UP         |
| C2 | KLEIN_TARGETS_OF_BCR_ABL1_FUSION           |
| C2 | LU_IL4_SIGNALING                           |
| C2 | MATTIOLI_MGUS_VS_PCL                       |
| C2 | MATTIOLI_MULTIPLE_MYELOMA_SUBGROUPS        |
| C2 | MOREAUX_B_LYMPHOCYTE_MATURATION_BY_TACI_DN |
| C2 | MOREAUX_B_LYMPHOCYTE_MATURATION_BY_TACI_UP |
| C2 | MUNSHI_MULTIPLE_MYELOMA_DN                 |
| C2 | MUNSHI_MULTIPLE_MYELOMA_UP                 |
| C2 | ODONNELL_TARGETS_OF_MYC_AND_TFRC_DN        |
| C2 | ODONNELL_TARGETS_OF_MYC_AND_TFRC_UP        |
| C2 | ODONNELL_TFRC_TARGETS_DN                   |
| C2 | ODONNELL_TFRC_TARGETS_UP                   |

|    |                                                                                                                                      |
|----|--------------------------------------------------------------------------------------------------------------------------------------|
| C2 | PELLICCIOTTA_HDAC_IN_ANTIGEN_PRESENTATION_DN                                                                                         |
| C2 | PELLICCIOTTA_HDAC_IN_ANTIGEN_PRESENTATION_UP                                                                                         |
| C2 | PENG_GLUCOSE_DEPRIVATION_DN                                                                                                          |
| C2 | PENG_GLUCOSE_DEPRIVATION_UP                                                                                                          |
| C2 | PENG_GLUTAMINE_DEPRIVATION_DN                                                                                                        |
| C2 | PENG_GLUTAMINE_DEPRIVATION_UP                                                                                                        |
| C2 | PENG_LEUCINE_DEPRIVATION_DN                                                                                                          |
| C2 | PENG_LEUCINE_DEPRIVATION_UP                                                                                                          |
| C2 | PENG_RAPAMYCIN_RESPONSE_DN                                                                                                           |
| C2 | PENG_RAPAMYCIN_RESPONSE_UP                                                                                                           |
| C2 | PID_BCR_5PATHWAY                                                                                                                     |
| C2 | PID_CASPASE_PATHWAY                                                                                                                  |
| C2 | PID_MYC_ACTIV_PATHWAY                                                                                                                |
| C2 | PID_MYC_PATHWAY                                                                                                                      |
| C2 | PID_MYC_REPRESS_PATHWAY                                                                                                              |
| C2 | PID_NFAT_3PATHWAY                                                                                                                    |
| C2 | PID_NFAT_TFPATHWAY                                                                                                                   |
| C2 | REACTOME_ACTIVATION_OF_NF_KAPPAB_IN_B_CELLS                                                                                          |
| C2 | REACTOME_ANTIGEN_ACTIVATES_B_CELL_RECEPTOR_LEADING_TO_GENERATION_OF_SECOND_MESSENGERS                                                |
| C2 | REACTOME_APC_C_CDC20_MEDIATED_DEGRADATION_OF_MITOTIC_PROTEINS                                                                        |
| C2 | REACTOME_APC_C_CDH1_MEDIATED_DEGRADATION_OF_CDC20_AND_OTHER_APC_C_CDH1_TARGETED_PROTEINS_IN_LATE_MITOSIS_EARLY_G1                    |
| C2 | REACTOME_APOPTOSIS                                                                                                                   |
| C2 | REACTOME_APOPTOSIS_INDUCED_DNA_FRAGMENTATION                                                                                         |
| C2 | REACTOME_APOPTOTIC_CLEAVAGE_OF_CELL_ADHESION_PROTEINS                                                                                |
| C2 | REACTOME_APOPTOTIC_CLEAVAGE_OF_CELLULAR_PROTEINS                                                                                     |
| C2 | REACTOME_APOPTOTIC_EXECUTION_PHASE                                                                                                   |
| C2 | REACTOME_CELL_CYCLE                                                                                                                  |
| C2 | REACTOME_CELL_CYCLE_CHECKPOINTS                                                                                                      |
| C2 | REACTOME_CELL_CYCLE_MITOTIC                                                                                                          |
| C2 | REACTOME_DOWNSTREAM_SIGNALING_EVENTS_OF_B_CELL_RECEPTOR_BCR                                                                          |
| C2 | REACTOME_EXTRINSIC_PATHWAY_FOR_APOPTOSIS                                                                                             |
| C2 | REACTOME_INHIBITION_OF_THE_PROTEOLYTIC_ACTIVITY_OF_APC_C_REQUIRED_FOR_THE_ONSET_OF_ANAPHASE_BY_MITOTIC_SPINDLE_CHECKPOINT_COMPONENTS |
| C2 | REACTOME_INTRINSIC_PATHWAY_FOR_APOPTOSIS                                                                                             |

|    |                                                                   |
|----|-------------------------------------------------------------------|
| C2 | REACTOME_LOSS_OF_NLP_FROM_MITOTIC_CENTROSOMES                     |
| C2 | REACTOME_MITOTIC_G1_G1_S_PHASES                                   |
| C2 | REACTOME_MITOTIC_G2_G2_M_PHASES                                   |
| C2 | REACTOME_MITOTIC_M_M_G1_PHASES                                    |
| C2 | REACTOME_MITOTIC_PROMETAPHASE                                     |
| C2 | REACTOME_RECRUITMENT_OF_MITOTIC_CENTROSOME_PROTEINS_AND_COMPLEXES |
| C2 | REACTOME_RECRUITMENT_OF_NUMA_TO_MITOTIC_CENTROSOMES               |
| C2 | REACTOME_REGULATION_OF_APOPTOSIS                                  |
| C2 | REACTOME_REGULATION_OF_MITOTIC_CELL_CYCLE                         |
| C2 | REACTOME_ROLE_OF_DCC_IN_REGULATING_APOPTOSIS                      |
| C2 | REACTOME_SIGNALING_BY_THE_B_CELL_RECEPTOR_BCR                     |
| C2 | SA_B_CELL_RECEPTOR_COMPLEXES                                      |
| C2 | SA_CASPASE_CASCADE                                                |
| C2 | SA_FAS_SIGNALING                                                  |
| C2 | SA_PROGRAMMED_CELL_DEATH                                          |
| C2 | SA_REG_CASCADE_OF_CYCLIN_EXPR                                     |
| C2 | SCHLOSSER_MYC_AND_SERUM_RESPONSE_SYNERGY                          |
| C2 | SCHLOSSER_MYC_TARGETS_AND_SERUM_RESPONSE_DN                       |
| C2 | SCHLOSSER_MYC_TARGETS_AND_SERUM_RESPONSE_UP                       |
| C2 | SCHLOSSER_MYC_TARGETS_REPRESSED_BY_SERUM                          |
| C2 | SCHLOSSER_SERUM_RESPONSE_AUGMENTED_BY_MYC                         |
| C2 | SCHLOSSER_SERUM_RESPONSE_DN                                       |
| C2 | SCHLOSSER_SERUM_RESPONSE_UP                                       |
| C2 | SCHUHMACHER_MYC_TARGETS_DN                                        |
| C2 | SCHUHMACHER_MYC_TARGETS_UP                                        |
| C2 | SHAFFER_IRF4_TARGETS_IN_ACTIVATED_B_LYMPHOCYTE                    |
| C2 | SHAFFER_IRF4_TARGETS_IN_MYELOMA_VS_MATURE_B_LYMPHOCYTE            |
| C2 | SHAFFER_IRF4_TARGETS_IN_PLASMA_CELL_VS_MATURE_B_LYMPHOCYTE        |
| C2 | SHIPP_DLBCL_CURED_VS_FATAL_DN                                     |
| C2 | SHIPP_DLBCL_CURED_VS_FATAL_UP                                     |
| C2 | SHIPP_DLBCL_VS_FOLLICULAR_LYMPHOMA_DN                             |
| C2 | SHIPP_DLBCL_VS_FOLLICULAR_LYMPHOMA_UP                             |
| C2 | SIG_BCR_SIGNALING_PATHWAY                                         |
| C2 | SIG_IL4RECEPTOR_IN_B_LYMPHOCYTES                                  |
| C2 | SIG_PIP3_SIGNALING_IN_B_LYMPHOCYTES                               |
| C2 | SMIRNOV_RESPONSE_TO_IR_2HR_DN                                     |

|    |                                              |
|----|----------------------------------------------|
| C2 | SMIRNOV_RESPONSE_TO_IR_2HR_UP                |
| C2 | SMIRNOV_RESPONSE_TO_IR_6HR_DN                |
| C2 | SMIRNOV_RESPONSE_TO_IR_6HR_UP                |
| C2 | ST_B_CELL_ANTIGEN_RECEPTOR                   |
| C2 | TARTE_PLASMA_CELL_VS_B_LYMPHOCYTE_DN         |
| C2 | TARTE_PLASMA_CELL_VS_B_LYMPHOCYTE_UP         |
| C2 | TARTE_PLASMA_CELL_VS_PLASMABLAST_DN          |
| C2 | TARTE_PLASMA_CELL_VS_PLASMABLAST_UP          |
| C2 | TAVOR_CEBPA_TARGETS_DN                       |
| C2 | TAVOR_CEBPA_TARGETS_UP                       |
| C2 | TRACEY_RESISTANCE_TO_IFNA2_DN                |
| C2 | TRACEY_RESISTANCE_TO_IFNA2_UP                |
| C2 | WAGNER_APO2_SENSITIVITY                      |
| C2 | WHITFIELD_CELL_CYCLE_LITERATURE              |
| C2 | ZHAN_EARLY_DIFFERENTIATION_GENES_DN          |
| C2 | ZHAN_EARLY_DIFFERENTIATION_GENES_UP          |
| C2 | ZHAN_LATE_DIFFERENTIATION_GENES_DN           |
| C2 | ZHAN_LATE_DIFFERENTIATION_GENES_UP           |
| C2 | ZHAN_MULTIPLE_MYELOMA_DN                     |
| C2 | ZHAN_MULTIPLE_MYELOMA_PR_DN                  |
| C2 | ZHAN_MULTIPLE_MYELOMA_PR_UP                  |
| C2 | ZHAN_MULTIPLE_MYELOMA_SPIKED                 |
| C2 | ZHAN_MULTIPLE_MYELOMA_UP                     |
| C2 | ZHAN_V1_LATE_DIFFERENTIATION_GENES_DN        |
| C2 | ZHAN_V1_LATE_DIFFERENTIATION_GENES_UP        |
| C2 | ZHAN_V2_LATE_DIFFERENTIATION_GENES           |
| C2 | ZHAN_VARIABLE_EARLY_DIFFERENTIATION_GENES_DN |
| C2 | ZHAN_VARIABLE_EARLY_DIFFERENTIATION_GENES_UP |
| C3 | CACGTG_MYC_Q2                                |
| C3 | MYC_Q2                                       |
| C3 | NFAT_Q4_01                                   |
| C3 | NFAT_Q6                                      |
| C3 | TGGAAA_NFAT_Q4_01                            |
| C4 | MODULE_126                                   |
| C4 | MODULE_291                                   |
| C4 | MODULE_312                                   |

|    |                                                                                               |
|----|-----------------------------------------------------------------------------------------------|
| C4 | MODULE_358                                                                                    |
| C4 | MODULE_361                                                                                    |
| C4 | MODULE_456                                                                                    |
| C4 | MODULE_537                                                                                    |
| C4 | MODULE_54                                                                                     |
| C4 | MODULE_56                                                                                     |
| C4 | MODULE_573                                                                                    |
| C4 | MORF_MYC                                                                                      |
| C5 | GO_ACTIVATION_OF_CYSTEINE_TYPE_ENDOPEPTIDASE_ACTIVITY_INVOLVED_IN_APOPTOTIC_SIGNALING_PATHWAY |
| C5 | GO_ANAPHASE_PROMOTING_COMPLEX                                                                 |
| C5 | GO_APOPTOTIC_CELL_CLEARANCE                                                                   |
| C5 | GO_APOPTOTIC_DNA_FRAGMENTATION                                                                |
| C5 | GO_APOPTOTIC_MITOCHONDRIAL_CHANGES                                                            |
| C5 | GO_APOPTOTIC_NUCLEAR_CHANGES                                                                  |
| C5 | GO_APOPTOTIC_PROCESS_INVOLVED_IN_DEVELOPMENT                                                  |
| C5 | GO_APOPTOTIC_PROCESS_INVOLVED_IN_MORPHOGENESIS                                                |
| C5 | GO_APOPTOTIC_SIGNALING_PATHWAY                                                                |
| C5 | GO_B_CELL_ACTIVATION                                                                          |
| C5 | GO_B_CELL_ACTIVATION_INVOLVED_IN_IMMUNE_RESPONSE                                              |
| C5 | GO_B_CELL_DIFFERENTIATION                                                                     |
| C5 | GO_B_CELL_HOMEOSTASIS                                                                         |
| C5 | GO_B_CELL_MEDIATED_IMMUNITY                                                                   |
| C5 | GO_B_CELL_PROLIFERATION                                                                       |
| C5 | GO_B_CELL_RECEPTOR_SIGNALING_PATHWAY                                                          |
| C5 | GO_CELL_AGING                                                                                 |
| C5 | GO_CELL_CYCLE                                                                                 |
| C5 | GO_CELL_CYCLE_ARREST                                                                          |
| C5 | GO_CELL_CYCLE_CHECKPOINT                                                                      |
| C5 | GO_CELL_CYCLE_DNA_REPLICATION                                                                 |
| C5 | GO_CELL_CYCLE_G1_S_PHASE_TRANSITION                                                           |
| C5 | GO_CELL_CYCLE_G2_M_PHASE_TRANSITION                                                           |
| C5 | GO_CELL_CYCLE_PHASE_TRANSITION                                                                |
| C5 | GO_CELL_CYCLE_PROCESS                                                                         |
| C5 | GO_CELL_DEATH                                                                                 |
| C5 | GO_CELL_DIVISION_SITE                                                                         |

|    |                                                                                          |
|----|------------------------------------------------------------------------------------------|
| C5 | GO_CELLULAR_COMPONENT_DISASSEMBLY_INVOLVED_IN_EXECUTION_PHASE_OF_APOPTOSIS               |
| C5 | GO_CELLULAR_SENESCENCE                                                                   |
| C5 | GO_CENTRIOLE                                                                             |
| C5 | GO_CENTROSOME_CYCLE                                                                      |
| C5 | GO_CHROMOSOME_CONDENSATION                                                               |
| C5 | GO_CHROMOSOME_SEPARATION                                                                 |
| C5 | GO_CYCLIN_BINDING                                                                        |
| C5 | GO_CYSTEINE_TYPE_ENDOPEPTIDASE_ACTIVITY_INVOLVED_IN_APOPTOTIC_PROCESS                    |
| C5 | GO_CYSTEINE_TYPE_ENDOPEPTIDASE_INHIBITOR_ACTIVITY_INVOLVED_IN_APOPTOTIC_PROCESS          |
| C5 | GO_CYSTEINE_TYPE_ENDOPEPTIDASE_REGULATOR_ACTIVITY_INVOLVED_IN_APOPTOTIC_PROCESS          |
| C5 | GO_CYTOPLASMIC_DYNEIN_COMPLEX                                                            |
| C5 | GO_DEATH_RECEPTOR_ACTIVITY                                                               |
| C5 | GO_DNA_INTEGRITY_CHECKPOINT                                                              |
| C5 | GO_DNA_REPLICATION_CHECKPOINT                                                            |
| C5 | GO_ESTABLISHMENT_OF_MITOTIC_SPINDLE_LOCALIZATION                                         |
| C5 | GO_ESTABLISHMENT_OF_MITOTIC_SPINDLE_ORIENTATION                                          |
| C5 | GO_EXECUTION_PHASE_OF_APOPTOSIS                                                          |
| C5 | GO_EXIT_FROM_MITOSIS                                                                     |
| C5 | GO_EXTRINSIC_APOPTOTIC_SIGNALING_PATHWAY                                                 |
| C5 | GO_EXTRINSIC_APOPTOTIC_SIGNALING_PATHWAY_VIA_DEATH_DOMAIN_RECEPTORS                      |
| C5 | GO_G1_DNA_DAMAGE_CHECKPOINT                                                              |
| C5 | GO_G2_DNA_DAMAGE_CHECKPOINT                                                              |
| C5 | GO_HOMOLOGOUS_CHROMOSOME_SEGREGATION                                                     |
| C5 | GO_INFLAMMATORY_RESPONSE_TO_ANTIGENIC_STIMULUS                                           |
| C5 | GO_INTRA_S_DNA_DAMAGE_CHECKPOINT                                                         |
| C5 | GO_INTRINSIC_APOPTOTIC_SIGNALING_PATHWAY                                                 |
| C5 | GO_INTRINSIC_APOPTOTIC_SIGNALING_PATHWAY_BY_P53_CLASS_MEDIATOR                           |
| C5 | GO_INTRINSIC_APOPTOTIC_SIGNALING_PATHWAY_IN_RESPONSE_TO_DNA_DAMAGE                       |
| C5 | GO_INTRINSIC_APOPTOTIC_SIGNALING_PATHWAY_IN_RESPONSE_TO_DNA_DAMAGE_BY_P53_CLASS_MEDIATOR |
| C5 | GO_INTRINSIC_APOPTOTIC_SIGNALING_PATHWAY_IN_RESPONSE_TO_ENDOPLASMIC_RETICULUM_STRESS     |
| C5 | GO_ISOTYPE_SWITCHING                                                                     |
| C5 | GO_LEUKOCYTE_APOPTOTIC_PROCESS                                                           |
| C5 | GO_LEUKOCYTE_PROLIFERATION                                                               |
| C5 | GO_LYMPHOCYTE_APOPTOTIC_PROCESS                                                          |
| C5 | GO_LYMPHOCYTE_HOMEOSTASIS                                                                |



|    |                                                                                                          |
|----|----------------------------------------------------------------------------------------------------------|
| C5 | GO_MATURE_B_CELL_DIFFERENTIATION                                                                         |
| C5 | GO_MATURE_B_CELL_DIFFERENTIATION_INVOLVED_IN_IMMUNE_RESPONSE                                             |
| C5 | GO_MITOTIC_CELL_CYCLE                                                                                    |
| C5 | GO_MITOTIC_CELL_CYCLE_ARREST                                                                             |
| C5 | GO_MITOTIC_CELL_CYCLE_CHECKPOINT                                                                         |
| C5 | GO_MITOTIC_CHROMOSOME_CONDENSATION                                                                       |
| C5 | GO_MITOTIC_CYTOKINESIS                                                                                   |
| C5 | GO_MITOTIC_DNA_INTEGRITY_CHECKPOINT                                                                      |
| C5 | GO_MITOTIC_G2_DNA_DAMAGE_CHECKPOINT                                                                      |
| C5 | GO_MITOTIC_G2_M_TRANSITION_CHECKPOINT                                                                    |
| C5 | GO_MITOTIC_NUCLEAR_DIVISION                                                                              |
| C5 | GO_MITOTIC_RECOMBINATION                                                                                 |
| C5 | GO_MITOTIC_SISTER_CHROMATID_COHESION                                                                     |
| C5 | GO_MITOTIC_SISTER_CHROMATID_SEGREGATION                                                                  |
| C5 | GO_MITOTIC_SPINDLE                                                                                       |
| C5 | GO_MITOTIC_SPINDLE_ASSEMBLY                                                                              |
| C5 | GO_MITOTIC_SPINDLE_ORGANIZATION                                                                          |
| C5 | GO_NECROTIC_CELL_DEATH                                                                                   |
| C5 | GO_NEGATIVE_REGULATION_OF_APOPTOTIC_SIGNALING_PATHWAY                                                    |
| C5 | GO_NEGATIVE_REGULATION_OF_B_CELL_ACTIVATION                                                              |
| C5 | GO_NEGATIVE_REGULATION_OF_B_CELL_APOPTOTIC_PROCESS                                                       |
| C5 | GO_NEGATIVE_REGULATION_OF_B_CELL_PROLIFERATION                                                           |
| C5 | GO_NEGATIVE_REGULATION_OF_CELL_CYCLE                                                                     |
| C5 | GO_NEGATIVE_REGULATION_OF_CELL_CYCLE_ARREST                                                              |
| C5 | GO_NEGATIVE_REGULATION_OF_CELL_CYCLE_G1_S_PHASE_TRANSITION                                               |
| C5 | GO_NEGATIVE_REGULATION_OF_CELL_CYCLE_G2_M_PHASE_TRANSITION                                               |
| C5 | GO_NEGATIVE_REGULATION_OF_CELL_CYCLE_PHASE_TRANSITION                                                    |
| C5 | GO_NEGATIVE_REGULATION_OF_CELL_CYCLE_PROCESS                                                             |
| C5 | GO_NEGATIVE_REGULATION_OF_DNA_DAMAGE_RESPONSE_SIGNAL_TRANSDUCTION_BY_P53_CLASS_MEDIAT<br>OR              |
| C5 | GO_NEGATIVE_REGULATION_OF_ENDOPLASMIC_RETICULUM_STRESS_INDUCED_INTRINSIC_APOPTOTIC_SIGN<br>ALING_PATHWAY |
| C5 | GO_NEGATIVE_REGULATION_OF_ENDOTHELIAL_CELL_APOPTOTIC_PROCESS                                             |
| C5 | GO_NEGATIVE_REGULATION_OF_EPITHELIAL_CELL_APOPTOTIC_PROCESS                                              |
| C5 | GO_NEGATIVE_REGULATION_OF_EXTRINSIC_APOPTOTIC_SIGNALING_PATHWAY                                          |
| C5 | GO_NEGATIVE_REGULATION_OF_EXTRINSIC_APOPTOTIC_SIGNALING_PATHWAY_VIA_DEATH_DOMAIN_RECEPT                  |

|    |                                                                                                         |
|----|---------------------------------------------------------------------------------------------------------|
|    | ORS                                                                                                     |
| C5 | GO_NEGATIVE_REGULATION_OF_INTRINSIC_APOPTOTIC_SIGNALING_PATHWAY                                         |
| C5 | GO_NEGATIVE_REGULATION_OF_INTRINSIC_APOPTOTIC_SIGNALING_PATHWAY_BY_P53_CLASS_MEDIATOR                   |
| C5 | GO_NEGATIVE_REGULATION_OF_INTRINSIC_APOPTOTIC_SIGNALING_PATHWAY_IN_RESPONSE_TO_DNA_DAMAGE               |
| C5 | GO_NEGATIVE_REGULATION_OF_LEUKOCYTE_APOPTOTIC_PROCESS                                                   |
| C5 | GO_NEGATIVE_REGULATION_OF_LEUKOCYTE_PROLIFERATION                                                       |
| C5 | GO_NEGATIVE_REGULATION_OF_LYMPHOCYTE_APOPTOTIC_PROCESS                                                  |
| C5 | GO_NEGATIVE_REGULATION_OF_MITOTIC_CELL_CYCLE                                                            |
| C5 | GO_NEGATIVE_REGULATION_OF_MITOTIC_NUCLEAR_DIVISION                                                      |
| C5 | GO_NEGATIVE_REGULATION_OF_OXIDATIVE_STRESS_INDUCED_INTRINSIC_APOPTOTIC_SIGNALING_PATHWAY                |
| C5 | GO_NEGATIVE_REGULATION_OF_RELEASE_OF_CYTOCHROME_C_FROM_MITOCHONDRIA                                     |
| C5 | GO_NUCLEAR_CHROMOSOME                                                                                   |
| C5 | GO_NUCLEOLAR_PART                                                                                       |
| C5 | GO_NUCLEOLUS                                                                                            |
| C5 | GO_PEPTIDASE_ACTIVATOR_ACTIVITY_INVOLVED_IN_APOPTOTIC_PROCESS                                           |
| C5 | GO_POSITIVE_REGULATION_OF_APOPTOTIC_SIGNALING_PATHWAY                                                   |
| C5 | GO_POSITIVE_REGULATION_OF_B_CELL_ACTIVATION                                                             |
| C5 | GO_POSITIVE_REGULATION_OF_B_CELL_DIFFERENTIATION                                                        |
| C5 | GO_POSITIVE_REGULATION_OF_B_CELL_MEDIATED_IMMUNITY                                                      |
| C5 | GO_POSITIVE_REGULATION_OF_B_CELL_PROLIFERATION                                                          |
| C5 | GO_POSITIVE_REGULATION_OF_CELL_CYCLE                                                                    |
| C5 | GO_POSITIVE_REGULATION_OF_CELL_CYCLE_ARREST                                                             |
| C5 | GO_POSITIVE_REGULATION_OF_CELL_CYCLE_G1_S_PHASE_TRANSITION                                              |
| C5 | GO_POSITIVE_REGULATION_OF_CELL_CYCLE_G2_M_PHASE_TRANSITION                                              |
| C5 | GO_POSITIVE_REGULATION_OF_CELL_CYCLE_PHASE_TRANSITION                                                   |
| C5 | GO_POSITIVE_REGULATION_OF_CELL_CYCLE_PROCESS                                                            |
| C5 | GO_POSITIVE_REGULATION_OF_CYSSTEINE_TYPE_ENDOPEPTIDASE_ACTIVITY_INVOLVED_IN_APOPTOTIC_SIGNALING_PATHWAY |
| C5 | GO_POSITIVE_REGULATION_OF_DNA_DAMAGE_RESPONSE_SIGNAL_TRANSDUCTION_BY_P53_CLASS_MEDIATOR                 |
| C5 | GO_POSITIVE_REGULATION_OF_EXECUTION_PHASE_OF_APOPTOSIS                                                  |
| C5 | GO_POSITIVE_REGULATION_OF_EXTRINSIC_APOPTOTIC_SIGNALING_PATHWAY                                         |
| C5 | GO_POSITIVE_REGULATION_OF_EXTRINSIC_APOPTOTIC_SIGNALING_PATHWAY_IN_ABSENCE_OF_LIGAND                    |
| C5 | GO_POSITIVE_REGULATION_OF_EXTRINSIC_APOPTOTIC_SIGNALING_PATHWAY_VIA_DEATH_DOMAIN_RECEPTORS              |
| C5 | GO_POSITIVE_REGULATION_OF_G1_S_TRANSITION_OF_MITOTIC_CELL_CYCLE                                         |

|    |                                                                                                                 |
|----|-----------------------------------------------------------------------------------------------------------------|
| C5 | GO_POSITIVE_REGULATION_OF_INTRINSIC_APOPTOTIC_SIGNALING_PATHWAY                                                 |
| C5 | GO_POSITIVE_REGULATION_OF_LEUKOCYTE_APOPTOTIC_PROCESS                                                           |
| C5 | GO_POSITIVE_REGULATION_OF_LEUKOCYTE_PROLIFERATION                                                               |
| C5 | GO_POSITIVE_REGULATION_OF_LYMPHOCYTE_APOPTOTIC_PROCESS                                                          |
| C5 | GO_POSITIVE_REGULATION_OF_MITOCHONDRIAL_OUTER_MEMBRANE_PERMEABILIZATION_INVOLVED_IN_APOPTOTIC_SIGNALING_PATHWAY |
| C5 | GO_POSITIVE_REGULATION_OF_MITOTIC_CELL_CYCLE                                                                    |
| C5 | GO_POSITIVE_REGULATION_OF_MITOTIC_NUCLEAR_DIVISION                                                              |
| C5 | GO_POSITIVE_REGULATION_OF_MITOTIC_SISTER_CHROMATID_SEPARATION                                                   |
| C5 | GO_POSITIVE_REGULATION_OF_NFAT_PROTEIN_IMPORT_INTO_NUCLEUS                                                      |
| C5 | GO_POSITIVE_REGULATION_OF_RELEASE_OF_CYTOCHROME_C_FROM_MITOCHONDRIA                                             |
| C5 | GO_PROTEIN_K11_LINKED_UBIQUITINATION                                                                            |
| C5 | GO_RAN_GTPASE_BINDING                                                                                           |
| C5 | GO_REGULATION_OF_APOPTOTIC_SIGNALING_PATHWAY                                                                    |
| C5 | GO_REGULATION_OF_B_CELL_ACTIVATION                                                                              |
| C5 | GO_REGULATION_OF_B_CELL_APOPTOTIC_PROCESS                                                                       |
| C5 | GO_REGULATION_OF_B_CELL_DIFFERENTIATION                                                                         |
| C5 | GO_REGULATION_OF_B_CELL_MEDIATED_IMMUNITY                                                                       |
| C5 | GO_REGULATION_OF_B_CELL_PROLIFERATION                                                                           |
| C5 | GO_REGULATION_OF_B_CELL_RECEPTOR_SIGNALING_PATHWAY                                                              |
| C5 | GO_REGULATION_OF_CALCINEURIN_NFAT_SIGNALING_CASCADE                                                             |
| C5 | GO_REGULATION_OF_CELL_CYCLE                                                                                     |
| C5 | GO_REGULATION_OF_CELL_CYCLE_ARREST                                                                              |
| C5 | GO_REGULATION_OF_CELL_CYCLE_CHECKPOINT                                                                          |
| C5 | GO_REGULATION_OF_CELL_CYCLE_G1_S_PHASE_TRANSITION                                                               |
| C5 | GO_REGULATION_OF_CELL_CYCLE_G2_M_PHASE_TRANSITION                                                               |
| C5 | GO_REGULATION_OF_CELL_CYCLE_PHASE_TRANSITION                                                                    |
| C5 | GO_REGULATION_OF_CELL_CYCLE_PROCESS                                                                             |
| C5 | GO_REGULATION_OF_CYSTEINE_TYPE_ENDOPEPTIDASE_ACTIVITY_INVOLVED_IN_APOPTOTIC_SIGNALING_PATHWAY                   |
| C5 | GO_REGULATION_OF_DNA_DAMAGE_RESPONSE_SIGNAL_TRANSDUCTION_BY_P53_CLASS_MEDIATOR                                  |
| C5 | GO_REGULATION_OF_ENDOPLASMIC_RETICULUM_STRESS_INDUCED_INTRINSIC_APOPTOTIC_SIGNALING_PATHWAY                     |
| C5 | GO_REGULATION_OF_EXECUTION_PHASE_OF_APOPTOSIS                                                                   |
| C5 | GO_REGULATION_OF_EXIT_FROM_MITOSIS                                                                              |
| C5 | GO_REGULATION_OF_EXTRINSIC_APOPTOTIC_SIGNALING_PATHWAY                                                          |

|    |                                                                                                        |
|----|--------------------------------------------------------------------------------------------------------|
| C5 | GO_REGULATION_OF_EXTRINSIC_APOPTOTIC_SIGNALING_PATHWAY_IN_ABSENCE_OF_LIGAND                            |
| C5 | GO_REGULATION_OF_EXTRINSIC_APOPTOTIC_SIGNALING_PATHWAY_VIA_DEATH_DOMAIN_RECEPTORS                      |
| C5 | GO_REGULATION_OF_INTRINSIC_APOPTOTIC_SIGNALING_PATHWAY                                                 |
| C5 | GO_REGULATION_OF_INTRINSIC_APOPTOTIC_SIGNALING_PATHWAY_BY_P53_CLASS_MEDIATOR                           |
| C5 | GO_REGULATION_OF_INTRINSIC_APOPTOTIC_SIGNALING_PATHWAY_IN_RESPONSE_TO_DNA_DAMAGE                       |
| C5 | GO_REGULATION_OF_INTRINSIC_APOPTOTIC_SIGNALING_PATHWAY_IN_RESPONSE_TO_DNA_DAMAGE_BY_P53_CLASS_MEDIATOR |
| C5 | GO_REGULATION_OF_LEUKOCYTE_APOPTOTIC_PROCESS                                                           |
| C5 | GO_REGULATION_OF_LEUKOCYTE_PROLIFERATION                                                               |
| C5 | GO_REGULATION_OF_LYMPHOCYTE_APOPTOTIC_PROCESS                                                          |
| C5 | GO_REGULATION_OF_MITOCHONDRIAL_MEMBRANE_PERMEABILITY_INVOLVED_IN_APOPTOTIC_PROCESS                     |
| C5 | GO_REGULATION_OF_MITOCHONDRIAL_OUTER_MEMBRANE_PERMEABILIZATION_INVOLVED_IN_APOPTOTIC_SIGNALING_PATHWAY |
| C5 | GO_REGULATION_OF_MITOTIC_CELL_CYCLE                                                                    |
| C5 | GO_REGULATION_OF_MITOTIC_SPINDLE_CHECKPOINT                                                            |
| C5 | GO_REGULATION_OF_NFAT_PROTEIN_IMPORT_INTO_NUCLEUS                                                      |
| C5 | GO_REGULATION_OF_NUCLEAR_CELL_CYCLE_DNA_REPLICATION                                                    |
| C5 | GO_REGULATION_OF_OXIDATIVE_STRESS_INDUCED_INTRINSIC_APOPTOTIC_SIGNALING_PATHWAY                        |
| C5 | GO_REGULATION_OF_PROTEIN_INSERTION_INTO_MITOCHONDRIAL_MEMBRANE_INVOLVED_IN_APOPTOTIC_SIGNALING_PATHWAY |
| C5 | GO_REGULATION_OF_RELEASE_OF_CYTOCHROME_C_FROM_MITOCHONDRIA                                             |
| C5 | GO_REGULATION_OF_SPINDLE_CHECKPOINT                                                                    |
| C5 | GO_REGULATION_OF_TRANSCRIPTION_INVOLVED_IN_G1_S_TRANSITION_OF_MITOTIC_CELL_CYCLE                       |
| C5 | GO_REGULATION_OF_TUMOR_NECROSIS_FACTOR_BIOSYNTHETIC_PROCESS                                            |
| C5 | GO_RELEASE_OF_CYTOCHROME_C_FROM_MITOCHONDRIA                                                           |
| C5 | GO_SIGNAL_TRANSDUCTION_BY_P53_CLASS_MEDIATOR                                                           |
| C5 | GO_SISTER_CHROMATID_COHESION                                                                           |
| C5 | GO_SISTER_CHROMATID_SEGREGATION                                                                        |
| C5 | GO_SPINDLE                                                                                             |
| C5 | GO_SPINDLE_CHECKPOINT                                                                                  |
| C5 | GO_SPINDLE_MICROTUBULE                                                                                 |
| C7 | GSE10325_BCELL_VS_LUPUS_BCELL_DN                                                                       |
| C7 | GSE10325_BCELL_VS_LUPUS_BCELL_UP                                                                       |
| C7 | GSE10325_BCELL_VS_MYELOID_DN                                                                           |
| C7 | GSE10325_BCELL_VS_MYELOID_UP                                                                           |
| C7 | GSE10325_CD4_TCELL_VS_BCELL_DN                                                                         |

|    |                                                       |
|----|-------------------------------------------------------|
| C7 | GSE10325_CD4_TCELL_VS_BCELL_UP                        |
| C7 | GSE10325_LUPUS_BCELL_VS_LUPUS_MYELOID_DN              |
| C7 | GSE10325_LUPUS_BCELL_VS_LUPUS_MYELOID_UP              |
| C7 | GSE10325_LUPUS_CD4_TCELL_VS_LUPUS_BCELL_DN            |
| C7 | GSE10325_LUPUS_CD4_TCELL_VS_LUPUS_BCELL_UP            |
| C7 | GSE12366_GC_BCELL_VS_PLASMA_CELL_DN                   |
| C7 | GSE12366_GC_BCELL_VS_PLASMA_CELL_UP                   |
| C7 | GSE12366_GC_VS_MEMORY_BCELL_DN                        |
| C7 | GSE12366_GC_VS_MEMORY_BCELL_UP                        |
| C7 | GSE12366_GC_VS_NAIVE_BCELL_DN                         |
| C7 | GSE12366_GC_VS_NAIVE_BCELL_UP                         |
| C7 | GSE12366_NAIVE_VS_MEMORY_BCELL_DN                     |
| C7 | GSE12366_NAIVE_VS_MEMORY_BCELL_UP                     |
| C7 | GSE12366_PLASMA_CELL_VS_MEMORY_BCELL_DN               |
| C7 | GSE12366_PLASMA_CELL_VS_MEMORY_BCELL_UP               |
| C7 | GSE12366_PLASMA_CELL_VS_NAIVE_BCELL_DN                |
| C7 | GSE12366_PLASMA_CELL_VS_NAIVE_BCELL_UP                |
| C7 | GSE12845_IGD_NEG_BLOOD_VS_DARKZONE_GC_TONSIL_BCELL_DN |
| C7 | GSE12845_IGD_NEG_BLOOD_VS_DARKZONE_GC_TONSIL_BCELL_UP |
| C7 | GSE12845_IGD_NEG_BLOOD_VS_NAIVE_TONSIL_BCELL_DN       |
| C7 | GSE12845_IGD_NEG_BLOOD_VS_NAIVE_TONSIL_BCELL_UP       |
| C7 | GSE12845_IGD_NEG_BLOOD_VS_PRE_GC_TONSIL_BCELL_DN      |
| C7 | GSE12845_IGD_NEG_BLOOD_VS_PRE_GC_TONSIL_BCELL_UP      |
| C7 | GSE12845_IGD_POS_BLOOD_VS_DARKZONE_GC_TONSIL_BCELL_DN |
| C7 | GSE12845_IGD_POS_BLOOD_VS_DARKZONE_GC_TONSIL_BCELL_UP |
| C7 | GSE12845_IGD_POS_BLOOD_VS_NAIVE_TONSIL_BCELL_DN       |
| C7 | GSE12845_IGD_POS_BLOOD_VS_NAIVE_TONSIL_BCELL_UP       |
| C7 | GSE12845_IGD_POS_BLOOD_VS_PRE_GC_TONSIL_BCELL_DN      |
| C7 | GSE12845_IGD_POS_BLOOD_VS_PRE_GC_TONSIL_BCELL_UP      |
| C7 | GSE12845_IGD_POS_VS_NEG_BLOOD_BCELL_DN                |
| C7 | GSE12845_IGD_POS_VS_NEG_BLOOD_BCELL_UP                |
| C7 | GSE12845_NAIVE_VS_DARKZONE_GC_TONSIL_BCELL_DN         |
| C7 | GSE12845_NAIVE_VS_DARKZONE_GC_TONSIL_BCELL_UP         |
| C7 | GSE12845_NAIVE_VS_PRE_GC_TONSIL_BCELL_DN              |
| C7 | GSE12845_NAIVE_VS_PRE_GC_TONSIL_BCELL_UP              |
| C7 | GSE12845_PRE_GC_VS_DARKZONE_GC_TONSIL_BCELL_DN        |

|    |                                                               |
|----|---------------------------------------------------------------|
| C7 | GSE12845_PRE_GC_VS_DARKZONE_GC_TONSIL_BCELL_UP                |
| C7 | GSE13411_IGM_MEMORY_BCELL_VS_PLASMA_CELL_DN                   |
| C7 | GSE13411_IGM_MEMORY_BCELL_VS_PLASMA_CELL_UP                   |
| C7 | GSE13411_IGM_VS_SWITCHED_MEMORY_BCELL_DN                      |
| C7 | GSE13411_IGM_VS_SWITCHED_MEMORY_BCELL_UP                      |
| C7 | GSE13411_NAIVE_BCELL_VS_PLASMA_CELL_DN                        |
| C7 | GSE13411_NAIVE_BCELL_VS_PLASMA_CELL_UP                        |
| C7 | GSE13411_NAIVE_VS_IGM_MEMORY_BCELL_DN                         |
| C7 | GSE13411_NAIVE_VS_IGM_MEMORY_BCELL_UP                         |
| C7 | GSE13411_NAIVE_VS_MEMORY_BCELL_DN                             |
| C7 | GSE13411_NAIVE_VS_MEMORY_BCELL_UP                             |
| C7 | GSE13411_NAIVE_VS_SWITCHED_MEMORY_BCELL_DN                    |
| C7 | GSE13411_NAIVE_VS_SWITCHED_MEMORY_BCELL_UP                    |
| C7 | GSE13411_PLASMA_CELL_VS_MEMORY_BCELL_DN                       |
| C7 | GSE13411_PLASMA_CELL_VS_MEMORY_BCELL_UP                       |
| C7 | GSE13411_SWITCHED_MEMORY_BCELL_VS_PLASMA_CELL_DN              |
| C7 | GSE13411_SWITCHED_MEMORY_BCELL_VS_PLASMA_CELL_UP              |
| C7 | GSE15271_CXCR4_POS_VS_NEG_GC_BCELL_DN                         |
| C7 | GSE15271_CXCR4_POS_VS_NEG_GC_BCELL_UP                         |
| C7 | GSE17186_BLOOD_VS_CORD_BLOOD_CD21HIGH_TRANSITIONAL_BCELL_DN   |
| C7 | GSE17186_BLOOD_VS_CORD_BLOOD_CD21HIGH_TRANSITIONAL_BCELL_UP   |
| C7 | GSE17186_BLOOD_VS_CORD_BLOOD_CD21LOW_TRANSITIONAL_BCELL_DN    |
| C7 | GSE17186_BLOOD_VS_CORD_BLOOD_CD21LOW_TRANSITIONAL_BCELL_UP    |
| C7 | GSE17186_BLOOD_VS_CORD_BLOOD_NAIVE_BCELL_DN                   |
| C7 | GSE17186_BLOOD_VS_CORD_BLOOD_NAIVE_BCELL_UP                   |
| C7 | GSE17186_CD21LOW_VS_CD21HIGH_TRANSITIONAL_BCELL_CORD_BLOOD_DN |
| C7 | GSE17186_CD21LOW_VS_CD21HIGH_TRANSITIONAL_BCELL_CORD_BLOOD_UP |
| C7 | GSE17186_CD21LOW_VS_CD21HIGH_TRANSITIONAL_BCELL_DN            |
| C7 | GSE17186_CD21LOW_VS_CD21HIGH_TRANSITIONAL_BCELL_UP            |
| C7 | GSE17186_MEMORY_VS_CD21HIGH_TRANSITIONAL_BCELL_DN             |
| C7 | GSE17186_MEMORY_VS_CD21HIGH_TRANSITIONAL_BCELL_UP             |
| C7 | GSE17186_MEMORY_VS_CD21LOW_TRANSITIONAL_BCELL_DN              |
| C7 | GSE17186_MEMORY_VS_CD21LOW_TRANSITIONAL_BCELL_UP              |
| C7 | GSE17186_MEMORY_VS_NAIVE_BCELL_DN                             |
| C7 | GSE17186_MEMORY_VS_NAIVE_BCELL_UP                             |
| C7 | GSE17186_NAIVE_VS_CD21HIGH_TRANSITIONAL_BCELL_CORD_BLOOD_DN   |

|    |                                                                           |
|----|---------------------------------------------------------------------------|
| C7 | GSE17186_NAIVE_VS_CD21HIGH_TRANSITIONAL_BCELL_CORD_BLOOD_UP               |
| C7 | GSE17186_NAIVE_VS_CD21HIGH_TRANSITIONAL_BCELL_DN                          |
| C7 | GSE17186_NAIVE_VS_CD21HIGH_TRANSITIONAL_BCELL_UP                          |
| C7 | GSE17186_NAIVE_VS_CD21LOW_TRANSITIONAL_BCELL_CORD_BLOOD_DN                |
| C7 | GSE17186_NAIVE_VS_CD21LOW_TRANSITIONAL_BCELL_CORD_BLOOD_UP                |
| C7 | GSE17186_NAIVE_VS_CD21LOW_TRANSITIONAL_BCELL_DN                           |
| C7 | GSE17186_NAIVE_VS_CD21LOW_TRANSITIONAL_BCELL_UP                           |
| C7 | GSE22229_RENAL_TRANSPLANT_IMMUNOSUPP_THERAPY_VS_HEALTHY_PBMC_DN           |
| C7 | GSE22229_RENAL_TRANSPLANT_IMMUNOSUPP_THERAPY_VS_HEALTHY_PBMC_UP           |
| C7 | GSE22229_RENAL_TRANSPLANT_VS_HEALTHY_PBMC_DN                              |
| C7 | GSE22229_RENAL_TRANSPLANT_VS_HEALTHY_PBMC_UP                              |
| C7 | GSE22229_UNTREATED_VS_IMMUNOSUPP_THERAPY_RENAL_TRANSPLANT_PATIENT_PBMC_DN |
| C7 | GSE22229_UNTREATED_VS_IMMUNOSUPP_THERAPY_RENAL_TRANSPLANT_PATIENT_PBMC_UP |
| C7 | GSE22886_CD4_TCELL_VS_BCELL_NAIVE_DN                                      |
| C7 | GSE22886_CD4_TCELL_VS_BCELL_NAIVE_UP                                      |
| C7 | GSE22886_CD8_TCELL_VS_BCELL_NAIVE_DN                                      |
| C7 | GSE22886_CD8_TCELL_VS_BCELL_NAIVE_UP                                      |
| C7 | GSE22886_IGA_VS_IGM_MEMORY_BCELL_DN                                       |
| C7 | GSE22886_IGA_VS_IGM_MEMORY_BCELL_UP                                       |
| C7 | GSE22886_IGG_IGA_MEMORY_BCELL_VS_BLOOD_PLASMA_CELL_DN                     |
| C7 | GSE22886_IGG_IGA_MEMORY_BCELL_VS_BLOOD_PLASMA_CELL_UP                     |
| C7 | GSE22886_IGG_IGA_MEMORY_BCELL_VS_BM_PLASMA_CELL_DN                        |
| C7 | GSE22886_IGG_IGA_MEMORY_BCELL_VS_BM_PLASMA_CELL_UP                        |
| C7 | GSE22886_IGM_MEMORY_BCELL_VS_BLOOD_PLASMA_CELL_DN                         |
| C7 | GSE22886_IGM_MEMORY_BCELL_VS_BLOOD_PLASMA_CELL_UP                         |
| C7 | GSE22886_IGM_MEMORY_BCELL_VS_BM_PLASMA_CELL_DN                            |
| C7 | GSE22886_IGM_MEMORY_BCELL_VS_BM_PLASMA_CELL_UP                            |
| C7 | GSE22886_NAIVE_BCELL_VS_BLOOD_PLASMA_CELL_DN                              |
| C7 | GSE22886_NAIVE_BCELL_VS_BLOOD_PLASMA_CELL_UP                              |
| C7 | GSE22886_NAIVE_BCELL_VS_BM_PLASMA_CELL_DN                                 |
| C7 | GSE22886_NAIVE_BCELL_VS_BM_PLASMA_CELL_UP                                 |
| C7 | GSE22886_NAIVE_BCELL_VS_DC_DN                                             |
| C7 | GSE22886_NAIVE_BCELL_VS_DC_UP                                             |
| C7 | GSE22886_NAIVE_BCELL_VS_MONOCYTE_DN                                       |
| C7 | GSE22886_NAIVE_BCELL_VS_MONOCYTE_UP                                       |
| C7 | GSE22886_NAIVE_BCELL_VS_NEUTROPHIL_DN                                     |

|    |                                                |
|----|------------------------------------------------|
| C7 | GSE22886_NAIVE_BCELL_VS_NEUTROPHIL_UP          |
| C7 | GSE22886_NAIVE_VS_IGG_IGA_MEMORY_BCELL_DN      |
| C7 | GSE22886_NAIVE_VS_IGG_IGA_MEMORY_BCELL_UP      |
| C7 | GSE22886_NAIVE_VS_IGM_MEMORY_BCELL_DN          |
| C7 | GSE22886_NAIVE_VS_IGM_MEMORY_BCELL_UP          |
| C7 | GSE22886_TCELL_VS_BCELL_NAIVE_DN               |
| C7 | GSE22886_TCELL_VS_BCELL_NAIVE_UP               |
| C7 | GSE27670_BLIMP1_VS_LMP1_TRANSDUCED_GC_BCELL_DN |
| C7 | GSE27670_BLIMP1_VS_LMP1_TRANSDUCED_GC_BCELL_UP |
| C7 | GSE27670_CTRL_VS_BLIMP1_TRANSDUCED_GC_BCELL_DN |
| C7 | GSE27670_CTRL_VS_BLIMP1_TRANSDUCED_GC_BCELL_UP |
| C7 | GSE27670_CTRL_VS_LMP1_TRANSDUCED_GC_BCELL_DN   |
| C7 | GSE27670_CTRL_VS_LMP1_TRANSDUCED_GC_BCELL_UP   |
| C7 | GSE30153_LUPUS_VS_HEALTHY_DONOR_BCELL_DN       |
| C7 | GSE30153_LUPUS_VS_HEALTHY_DONOR_BCELL_UP       |
| C7 | GSE38697_LIGHT_ZONE_VS_DARK_ZONE_BCELL_DN      |
| C7 | GSE38697_LIGHT_ZONE_VS_DARK_ZONE_BCELL_UP      |
| C7 | GSE3982_BCELL_VS_BASOPHIL_DN                   |
| C7 | GSE3982_BCELL_VS_BASOPHIL_UP                   |
| C7 | GSE3982_BCELL_VS_CENT_MEMORY_CD4_TCELL_DN      |
| C7 | GSE3982_BCELL_VS_CENT_MEMORY_CD4_TCELL_UP      |
| C7 | GSE3982_BCELL_VS_EFF_MEMORY_CD4_TCELL_DN       |
| C7 | GSE3982_BCELL_VS_EFF_MEMORY_CD4_TCELL_UP       |
| C7 | GSE3982_BCELL_VS_NKCELL_DN                     |
| C7 | GSE3982_BCELL_VS_NKCELL_UP                     |
| C7 | GSE3982_BCELL_VS_TH1_DN                        |
| C7 | GSE3982_BCELL_VS_TH1_UP                        |
| C7 | GSE3982_BCELL_VS_TH2_DN                        |
| C7 | GSE3982_BCELL_VS_TH2_UP                        |
| C7 | GSE3982_DC_VS_BCELL_DN                         |
| C7 | GSE3982_DC_VS_BCELL_UP                         |
| C7 | GSE3982_EOSINOPHIL_VS_BCELL_DN                 |
| C7 | GSE3982_EOSINOPHIL_VS_BCELL_UP                 |
| C7 | GSE3982_MAC_VS_BCELL_DN                        |
| C7 | GSE3982_MAC_VS_BCELL_UP                        |
| C7 | GSE3982_MAST_CELL_VS_BCELL_DN                  |



|    |                                                         |
|----|---------------------------------------------------------|
| C7 | GSE3982_MAST_CELL_VS_BCELL_UP                           |
| C7 | GSE3982_MEMORY_CD4_TCELL_VS_BCELL_DN                    |
| C7 | GSE3982_MEMORY_CD4_TCELL_VS_BCELL_UP                    |
| C7 | GSE3982_NEUTROPHIL_VS_BCELL_DN                          |
| C7 | GSE3982_NEUTROPHIL_VS_BCELL_UP                          |
| C7 | GSE42724_B1_BCELL_VS_PLASMABLAST_DN                     |
| C7 | GSE42724_B1_BCELL_VS_PLASMABLAST_UP                     |
| C7 | GSE42724_MEMORY_BCELL_VS_PLASMABLAST_DN                 |
| C7 | GSE42724_MEMORY_BCELL_VS_PLASMABLAST_UP                 |
| C7 | GSE42724_MEMORY_VS_B1_BCELL_DN                          |
| C7 | GSE42724_MEMORY_VS_B1_BCELL_UP                          |
| C7 | GSE42724_NAIVE_BCELL_VS_PLASMABLAST_DN                  |
| C7 | GSE42724_NAIVE_BCELL_VS_PLASMABLAST_UP                  |
| C7 | GSE42724_NAIVE_VS_B1_BCELL_DN                           |
| C7 | GSE42724_NAIVE_VS_B1_BCELL_UP                           |
| C7 | GSE42724_NAIVE_VS_MEMORY_BCELL_DN                       |
| C7 | GSE42724_NAIVE_VS_MEMORY_BCELL_UP                       |
| C7 | GSE4590_LARGE_PRE_BCELL_VS_VPREB_POS_LARGE_PRE_BCELL_DN |
| C7 | GSE4590_LARGE_PRE_BCELL_VS_VPREB_POS_LARGE_PRE_BCELL_UP |
| C7 | GSE4590_PRE_BCELL_VS_LARGE_PRE_BCELL_DN                 |
| C7 | GSE4590_PRE_BCELL_VS_LARGE_PRE_BCELL_UP                 |
| C7 | GSE4590_PRE_BCELL_VS_SMALL_PRE_BCELL_DN                 |
| C7 | GSE4590_PRE_BCELL_VS_SMALL_PRE_BCELL_UP                 |
| C7 | GSE4590_PRE_BCELL_VS_VPREB_POS_LARGE_PRE_BCELL_DN       |
| C7 | GSE4590_PRE_BCELL_VS_VPREB_POS_LARGE_PRE_BCELL_UP       |
| C7 | GSE4590_SMALL_VS_LARGE_PRE_BCELL_DN                     |
| C7 | GSE4590_SMALL_VS_LARGE_PRE_BCELL_UP                     |
| C7 | GSE4590_SMALL_VS_VPREB_POS_LARGE_PRE_BCELL_DN           |
| C7 | GSE4590_SMALL_VS_VPREB_POS_LARGE_PRE_BCELL_UP           |
| C7 | GSE46143_CTRL_VS_LMP2A_TRANSDUCED_CD10_POS_GC_BCELL_DN  |
| C7 | GSE46143_CTRL_VS_LMP2A_TRANSDUCED_CD10_POS_GC_BCELL_UP  |
| H  | HALLMARK_ADIPOGENESIS                                   |
| H  | HALLMARK_ALLOGRAFT_REJECTION                            |
| H  | HALLMARK_ANDROGEN_RESPONSE                              |
| H  | HALLMARK_ANGIOGENESIS                                   |
| H  | HALLMARK_APICAL_JUNCTION                                |

|   |                                            |
|---|--------------------------------------------|
| H | HALLMARK_APICAL_SURFACE                    |
| H | HALLMARK_APOPTOSIS                         |
| H | HALLMARK_BILE_ACID_METABOLISM              |
| H | HALLMARK_CHOLESTEROL_HOMEOSTASIS           |
| H | HALLMARK_COAGULATION                       |
| H | HALLMARK_COMPLEMENT                        |
| H | HALLMARK_DNA_REPAIR                        |
| H | HALLMARK_E2F_TARGETS                       |
| H | HALLMARK_EPITHELIAL_MESENCHYMAL_TRANSITION |
| H | HALLMARK_ESTROGEN_RESPONSE_EARLY           |
| H | HALLMARK_ESTROGEN_RESPONSE_LATE            |
| H | HALLMARK_FATTY_ACID_METABOLISM             |
| H | HALLMARK_G2M_CHECKPOINT                    |
| H | HALLMARK_GLYCOLYSIS                        |
| H | HALLMARK_HEDGEHOG_SIGNALING                |
| H | HALLMARK_HEME_METABOLISM                   |
| H | HALLMARK_HYPOXIA                           |
| H | HALLMARK_IL2_STAT5_SIGNALING               |
| H | HALLMARK_IL6_JAK_STAT3_SIGNALING           |
| H | HALLMARK_INFLAMMATORY_RESPONSE             |
| H | HALLMARK_INTERFERON_ALPHA_RESPONSE         |
| H | HALLMARK_INTERFERON_GAMMA_RESPONSE         |
| H | HALLMARK_KRAS_SIGNALING_DN                 |
| H | HALLMARK_KRAS_SIGNALING_UP                 |
| H | HALLMARK_MITOTIC_SPINDLE                   |
| H | HALLMARK_MTORC1_SIGNALING                  |
| H | HALLMARK_MYC_TARGETS_V1                    |
| H | HALLMARK_MYC_TARGETS_V2                    |
| H | HALLMARK_MYOGENESIS                        |
| H | HALLMARK_NOTCH_SIGNALING                   |
| H | HALLMARK_OXIDATIVE_PHOSPHORYLATION         |
| H | HALLMARK_P53_PATHWAY                       |
| H | HALLMARK_PANCREAS_BETA_CELLS               |
| H | HALLMARK_PEROXISOME                        |
| H | HALLMARK_PI3K_AKT_MTOR_SIGNALING           |
| H | HALLMARK_PROTEIN_SECRETION                 |

|   |                                          |
|---|------------------------------------------|
| H | HALLMARK_REACTIVE_OXIGEN_SPECIES_PATHWAY |
| H | HALLMARK_SPERMATOGENESIS                 |
| H | HALLMARK_TGF_BETA_SIGNALING              |
| H | HALLMARK_TNFA_SIGNALING_VIA_NFKB         |
| H | HALLMARK_UNFOLDED_PROTEIN_RESPONSE       |
| H | HALLMARK_UV_RESPONSE_DN                  |
| H | HALLMARK_UV_RESPONSE_UP                  |
| H | HALLMARK_WNT_BETA_CATENIN_SIGNALING      |
| H | HALLMARK_XENOBIOTIC_METABOLISM           |
