# Supplementary material for: Immunosuppressive FK506 treatment leads to more frequent EBV-associated lymphoproliferative disease in humanized mice
Source: PubMed Central journal article supplement (PMC7162544; doi:10.1371/journal.ppat.1008477), 2020-04-06
Supplement: ppat.1008477.s003.pdf [file ppat.1008477.s003.pdf]

## S2 Table. GSEA results.

| Set | Comparison                     | Name                                         | Genes (N=) | Direction | PValue      | FDR         | PValue Mixed | Deg (N=) | Set Size | FDR Mixed   |
|-----|--------------------------------|----------------------------------------------|------------|-----------|-------------|-------------|--------------|----------|----------|-------------|
| h   | EBV- FK506+vs. EBV- FK506-     | HALLMARK_INTERFERON_ALPHA_RESPONSE           | 92         | Down      | 2.00E-08    | 7.59E-06    | 0.003150207  | 7        | 97       | 0.201018672 |
| h   | EBV- FK506+vs. EBV- FK506-     | HALLMARK_INTERFERON_GAMMA_RESPONSE           | 182        | Down      | 1.36E-06    | 0.000275025 | 0.009262029  | 8        | 200      | 0.338375047 |
| h   | EBV- FK506+vs. EBV- FK506-     | HALLMARK_MYC_TARGETS_V1                      | 199        | Up        | 1.67E-05    | 0.001946971 | 0.311592188  | 10       | 200      | 0.948192912 |
| h   | EBV- FK506+vs. EBV- FK506-     | HALLMARK_MYC_TARGETS_V2                      | 58         | Up        | 5.63E-05    | 0.004742164 | 0.10834336   | 4        | 58       | 0.802430644 |
| h   | EBV- FK506+vs. EBV- FK506-     | HALLMARK_IL6_JAK_STAT3_SIGNALING             | 62         | Mixed     | 0.005960181 | 0.012613351 | 4.00E-05     | 1        | 87       | 0.012613351 |
| h   | EBV- FK506+vs. EBV- FK506-     | HALLMARK_HEDGEHOG_SIGNALING                  | 17         | Down      | 0.000259925 | 0.014198926 | 0.00875681   | 0        | 36       | 0.331664191 |
| c2  | EBV- FK506+vs. EBV- FK506-     | HADDAD_B_LYMPHOCYTE_PROGENITOR               | 254        | Down      | 1.64E-05    | 0.001946971 | 0.000733668  | 6        | 293      | 0.111150777 |
| c2  | EBV- FK506+vs. EBV- FK506-     | DANG_MYC_TARGETS_UP                          | 133        | Up        | 3.00E-05    | 0.003137071 | 0.33534322   | 7        | 143      | 0.959158425 |
| c2  | EBV- FK506+vs. EBV- FK506-     | SA_CASPASE_CASCADE                           | 19         | Down      | 0.000374059 | 0.019210131 | 0.029474584  | 1        | 19       | 0.546564493 |
| c2  | EBV- FK506+vs. EBV- FK506-     | SCHUHMACHER_MYC_TARGETS_UP                   | 79         | Up        | 0.00049091  | 0.023241509 | 0.345014275  | 3        | 80       | 0.959158425 |
| c2  | EBV- FK506+vs. EBV- FK506-     | SCHLOSSER_MYC_TARGETS_AND_SERUM_RESPONSE_D N | 46         | Up        | 0.000652493 | 0.028951521 | 0.214245524  | 3        | 47       | 0.913287618 |
| c5  | EBV- FK506+vs. EBV- FK506-     | GO_APOPTOTIC_PROCESS_INVOLVED_IN_DEVELOPMENT | 12         | Down      | 0.000922622 | 0.03630578  | 0.008687511  | 0        | 21       | 0.331664191 |
| c5  | EBV- FK506+vs. EBV- FK506-     | GO_NUCLEOLAR_PART                            | 59         | Up        | 0.000947759 | 0.036816778 | 0.983340196  | 5        | 62       | 0.999416688 |
| c7  | EBV- FK506+vs. EBV- FK506-     | GSE42724_NAIVE_BCELL_VS_PLASMABLAST_UP       | 161        | Down      | 2.92E-10    | 2.95E-07    | 1.60E-05     | 9        | 199      | 0.008458777 |
| c7  | EBV- FK506+vs. EBV- FK506-     | GSE42724_NAIVE_VS_B1_BCELL_DN                | 167        | Up        | 3.12E-05    | 0.003152003 | 0.178167446  | 5        | 199      | 0.892294232 |
| c7  | EBV- FK506+vs. EBV- FK506-     | GSE3982_BCELL_VS_BASOPHIL_DN                 | 132        | Down      | 0.000178193 | 0.011487787 | 0.081341658  | 4        | 200      | 0.727750384 |
| c7  | EBV- FK506+vs. EBV- FK506-     | GSE22886_CD8_TCELL_VS_BCELL_NAIVE_DN         | 144        | Mixed     | 0.100428407 | 0.035942487 | 0.000154209  | 3        | 200      | 0.035942487 |
| c7  | EBV- FK506+vs. EBV- FK506-     | GSE3982_BCELL_VS_TH1_DN                      | 147        | Down      | 0.001173728 | 0.041839955 | 0.456608282  | 6        | 200      | 0.980075513 |
| c2  | EBV+ FK506- vs. EBV- FK506-    | PELLICCIOTTA_HDAC_IN_ANTIGEN_PRESENTATION_DN | 49         | Up        | 0.000245222 | 0.014019291 | 0.307945323  | 0        | 49       | 0.948192912 |
| c7  | EBV+ FK506- vs. EBV- FK506-    | GSE38697_LIGHT_ZONE_VS_DARK_ZONE_BCELL_DN    | 32         | Down      | 0.000146512 | 0.010323981 | 0.056850591  | 2        | 122      | 0.621587248 |
| c7  | EBV+ FK506- vs. EBV- FK506-    | GSE10325_LUPUS_BCELL_VS_LUPUS_MYELOID_DN     | 164        | Down      | 0.001168498 | 0.041839955 | 0.273520961  | 5        | 200      | 0.934838348 |
| h   | EBV+EBV- FK506+vs. EBV- FK506+ | HALLMARK_INTERFERON_ALPHA_RESPONSE           | 92         | Up        | 9.57E-05    | 0.007431806 | 0.09096596   | 7        | 97       | 0.757343626 |
| h   | EBV+ FK506+ vs. EBV- FK506+    | HALLMARK_IL6_JAK_STAT3_SIGNALING             | 62         | Mixed     | 0.493932238 | 0.008458777 | 1.68E-05     | 1        | 87       | 0.008458777 |

|    |                             |                                              |     |       |             |             |             |    |     |             |
|----|-----------------------------|----------------------------------------------|-----|-------|-------------|-------------|-------------|----|-----|-------------|
| h  | EBV+ FK506+ vs. EBV- FK506+ | HALLMARK_MYC_TARGETS_V2                      | 58  | Up    | 0.000409099 | 0.020659498 | 0.434204986 | 4  | 58  | 0.978884616 |
| h  | EBV+ FK506+ vs. EBV- FK506+ | HALLMARK_INTERFERON_GAMMA_RESPONSE           | 182 | Up    | 0.000771731 | 0.031629604 | 0.014856791 | 8  | 200 | 0.389356831 |
| h  | EBV+ FK506+ vs. EBV- FK506+ | HALLMARK_ALLOGRAFT_REJECTION                 | 164 | Mixed | 0.007695245 | 0.043833495 | 0.000202531 | 7  | 200 | 0.043833495 |
| c2 | EBV+ FK506+ vs. EBV- FK506+ | PELLICCIOTTA_HDAC_IN_ANTIGEN_PRESENTATION_DN | 49  | Up    | 0.000122347 | 0.009041761 | 0.119858453 | 0  | 49  | 0.812407352 |
| c2 | EBV+ FK506+ vs. EBV- FK506+ | ZHAN_MULTIPLE_MYELOMA_DN                     | 24  | Down  | 0.00020594  | 0.012625811 | 0.049529343 | 1  | 41  | 0.614570173 |
| c7 | EBV+ FK506+ vs. EBV- FK506+ | GSE10325_LUPUS_BCELL_VS_LUPUS_MYELOID_DN     | 164 | Down  | 1.13E-06    | 0.000263352 | 0.003229648 | 5  | 200 | 0.201018672 |
| c7 | EBV+ FK506+ vs. EBV- FK506+ | GSE42724_NAIVE_BCELL_VS_PLASMABLAST_UP       | 161 | Up    | 3.55E-05    | 0.003361542 | 0.00775475  | 9  | 199 | 0.309169645 |
| c7 | EBV+ FK506+ vs. EBV- FK506+ | GSE22886_NAIVE_BCELL_VS_MONOCYTE_DN          | 183 | Down  | 0.000238638 | 0.013949652 | 0.051543346 | 7  | 200 | 0.621587248 |
| h  | EBV+ FK506+ vs. EBV+ FK506- | HALLMARK_MYC_TARGETS_V2                      | 58  | Up    | 2.58E-14    | 7.83E-11    | 1.08E-08    | 4  | 58  | 1.63E-05    |
| h  | EBV+ FK506+ vs. EBV+ FK506- | HALLMARK_MYC_TARGETS_V1                      | 199 | Up    | 5.19E-09    | 2.24E-06    | 0.004456695 | 10 | 200 | 0.22674753  |
| h  | EBV+ FK506+ vs. EBV+ FK506- | HALLMARK_HEME_METABOLISM                     | 166 | Down  | 1.03E-05    | 0.001421078 | 0.123230012 | 10 | 200 | 0.821345159 |
| h  | EBV+ FK506+ vs. EBV+ FK506- | HALLMARK_E2F_TARGETS                         | 193 | Up    | 3.76E-05    | 0.003453056 | 0.469212981 | 7  | 200 | 0.980075513 |
| h  | EBV+ FK506+ vs. EBV+ FK506- | HALLMARK_HEDGEHOG_SIGNALING                  | 17  | Down  | 0.000629747 | 0.028911108 | 0.123820107 | 0  | 36  | 0.821345159 |
| h  | EBV+ FK506+ vs. EBV+ FK506- | HALLMARK_IL6_JAK_STAT3_SIGNALING             | 62  | Down  | 0.001007466 | 0.037877129 | 0.004918596 | 1  | 87  | 0.237121162 |
| c2 | EBV+ FK506+ vs. EBV+ FK506- | SCHUHMACHER_MYC_TARGETS_UP                   | 79  | Up    | 8.42E-13    | 1.28E-09    | 7.87E-10    | 3  | 80  | 2.39E-06    |
| c2 | EBV+ FK506+ vs. EBV+ FK506- | DANG_MYC_TARGETS_UP                          | 133 | Up    | 9.52E-10    | 5.77E-07    | 2.70E-06    | 7  | 143 | 0.002047607 |
| c2 | EBV+ FK506+ vs. EBV+ FK506- | SCHLOSSER_MYC_TARGETS_AND_SERUM_RESPONSE_DN  | 46  | Up    | 1.20E-09    | 6.04E-07    | 7.08E-07    | 3  | 47  | 0.000714707 |
| c2 | EBV+ FK506+ vs. EBV+ FK506- | PENG_LEUCINE_DEPRIVATION_DN                  | 177 | Up    | 2.49E-08    | 8.39E-06    | 0.001014079 | 6  | 187 | 0.128027494 |
| c2 | EBV+ FK506+ vs. EBV+ FK506- | PENG_GLUTAMINE_DEPRIVATION_DN                | 314 | Up    | 2.78E-08    | 8.43E-06    | 0.005925323 | 9  | 337 | 0.267966084 |
| c2 | EBV+ FK506+ vs. EBV+ FK506- | HADDAD_B_LYMPHOCYTE_PROGENITOR               | 254 | Down  | 1.22E-07    | 3.37E-05    | 0.003306601 | 6  | 293 | 0.201018672 |
| c2 | EBV+ FK506+ vs. EBV+ FK506- | BILD_MYC_ONCOGENIC_SIGNATURE                 | 162 | Up    | 1.23E-06    | 0.000265412 | 1.98E-05    | 8  | 206 | 0.008586439 |
| c2 | EBV+ FK506+ vs. EBV+ FK506- | PENG_RAPAMYCIN_RESPONSE_DN                   | 231 | Up    | 1.80E-06    | 0.000321177 | 0.013236694 | 13 | 245 | 0.387059286 |
| c2 | EBV+ FK506+ vs. EBV+ FK506- | PID_MYC_ACTIV_PATHWAY                        | 73  | Up    | 2.46E-06    | 0.000414326 | 0.00331714  | 5  | 79  | 0.201018672 |
| c2 | EBV+ FK506+ vs. EBV+ FK506- | ZHAN_MULTIPLE_MYELOMA_DN                     | 24  | Down  | 3.92E-05    | 0.003489062 | 0.002600576 | 1  | 41  | 0.201018672 |
| c2 | EBV+ FK506+ vs. EBV+ FK506- | TARTE_PLASMA_CELL_VS_PLASMABLAST_DN          | 298 | Up    | 8.44E-05    | 0.006728949 | 0.02162392  | 16 | 309 | 0.488248953 |

|    |                             |                                                 |     |       |             |             |             |    |     |             |
|----|-----------------------------|-------------------------------------------------|-----|-------|-------------|-------------|-------------|----|-----|-------------|
| c2 | EBV+ FK506+ vs. EBV+ FK506- | ACOSTA_PROLIFERATION_INDEPENDENT_MYC_TARGETS_UP | 76  | Up    | 0.000144216 | 0.010323981 | 0.045714649 | 3  | 84  | 0.59704908  |
| c2 | EBV+ FK506+ vs. EBV+ FK506- | SCHLOSSER_MYC_TARGETS_AND_SERUM_RESPONSE_UP     | 47  | Up    | 0.000172091 | 0.011487787 | 0.044383261 | 1  | 47  | 0.590320947 |
| c2 | EBV+ FK506+ vs. EBV+ FK506- | SCHLOSSER_MYC_TARGETS_REPRESSED_BY_SERUM        | 154 | Up    | 0.000175218 | 0.011487787 | 0.117694716 | 11 | 159 | 0.811289041 |
| c2 | EBV+ FK506+ vs. EBV+ FK506- | HASLINGER_B_CELL_WITH_MUTATED_VH_GENES          | 12  | Mixed | 0.297252709 | 0.012613351 | 4.16E-05    | 0  | 18  | 0.012613351 |
| c2 | EBV+ FK506+ vs. EBV+ FK506- | GARY_CD5_TARGETS_DN                             | 415 | Up    | 0.0002394   | 0.013949652 | 0.591456579 | 13 | 431 | 0.999416688 |
| c2 | EBV+ FK506+ vs. EBV+ FK506- | TARTE_PLASMA_CELL_VS_B_LYMPHOCYTE_UP            | 72  | Down  | 0.000669642 | 0.028985917 | 0.568409218 | 2  | 78  | 0.999416688 |
| c2 | EBV+ FK506+ vs. EBV+ FK506- | BASSO_B_LYMPHOCYTE_NETWORK                      | 138 | Up    | 0.000772472 | 0.031629604 | 0.003470659 | 5  | 143 | 0.202232608 |
| c2 | EBV+ FK506+ vs. EBV+ FK506- | BASSO_HAIRY_CELL_LEUKEMIA_DN                    | 57  | Down  | 0.000999303 | 0.037877129 | 0.037846937 | 3  | 80  | 0.581832186 |
| c2 | EBV+ FK506+ vs. EBV+ FK506- | DIRMEIER_LMP1_RESPONSE_LATE_UP                  | 57  | Up    | 0.001394247 | 0.047467047 | 0.078075984 | 2  | 57  | 0.712369661 |
| c3 | EBV+ FK506+ vs. EBV+ FK506- | TF_MYC_Q2                                       | 124 | Up    | 0.001093033 | 0.040388913 | 0.05102674  | 9  | 185 | 0.621587248 |
| c4 | EBV+ FK506+ vs. EBV+ FK506- | MODULE_54                                       | 226 | Up    | 0.000801597 | 0.032384504 | 0.757284249 | 5  | 263 | 0.999416688 |
| c5 | EBV+ FK506+ vs. EBV+ FK506- | GO_NUCLEOLAR_PART                               | 59  | Up    | 5.30E-10    | 4.02E-07    | 5.15E-05    | 5  | 62  | 0.014198037 |
| c5 | EBV+ FK506+ vs. EBV+ FK506- | GO_RAN_GTPASE_BINDING                           | 27  | Up    | 7.06E-05    | 0.005785034 | 0.004560866 | 0  | 31  | 0.22674753  |
| c5 | EBV+ FK506+ vs. EBV+ FK506- | GO_DEATH_RECEPTOR_ACTIVITY                      | 17  | Mixed | 0.017373701 | 0.012613351 | 3.44E-05    | 0  | 24  | 0.012613351 |
| c5 | EBV+ FK506+ vs. EBV+ FK506- | GO_NUCLEOLUS                                    | 741 | Up    | 0.000648975 | 0.028951521 | 0.152926304 | 39 | 848 | 0.88260324  |
| c7 | EBV+ FK506+ vs. EBV+ FK506- | GSE10325_LUPUS_BCELL_VS_LUPUS_MYELOID_DN        | 164 | Down  | 5.92E-07    | 0.000149471 | 6.03E-05    | 5  | 200 | 0.015234936 |
| c7 | EBV+ FK506+ vs. EBV+ FK506- | GSE10325_BCELL_VS_MYELOID_DN                    | 153 | Down  | 4.16E-06    | 0.000641739 | 0.007503348 | 4  | 200 | 0.303135275 |
| c7 | EBV+ FK506+ vs. EBV+ FK506- | GSE3982_BCELL_VS_BASOPHIL_DN                    | 132 | Down  | 2.88E-05    | 0.003137071 | 0.074568802 | 4  | 200 | 0.703873736 |
| c7 | EBV+ FK506+ vs. EBV+ FK506- | GSE42724_NAIVE_VS_B1_BCELL_DN                   | 167 | Up    | 0.00010393  | 0.007872668 | 0.011091208 | 5  | 199 | 0.373404016 |
| c7 | EBV+ FK506+ vs. EBV+ FK506- | GSE12366_PLASMA_CELL_VS_NAIVE_BCELL_UP          | 142 | Down  | 0.000467312 | 0.022475491 | 0.886310678 | 7  | 200 | 0.999416688 |
| c7 | EBV+ FK506+ vs. EBV+ FK506- | GSE12366_PLASMA_CELL_VS_MEMORY_BCELL_UP         | 137 | Down  | 0.000724736 | 0.030928893 | 0.898162131 | 5  | 200 | 0.999416688 |
| c7 | EBV+ FK506+ vs. EBV+ FK506- | GSE22886_NAIVE_BCELL_VS_BM_PLASMA_CELL_DN       | 162 | Down  | 0.000772126 | 0.031629604 | 0.447382286 | 4  | 200 | 0.980075513 |
| c7 | EBV+ FK506+ vs. EBV+ FK506- | GSE3982_EOSINOPHIL_VS_BCELL_UP                  | 118 | Down  | 0.001012557 | 0.037877129 | 0.119431822 | 4  | 200 | 0.812407352 |
| c7 | EBV+ FK506+ vs. EBV+ FK506- | GSE22886_NAIVE_BCELL_VS_MONOCYTE_DN             | 183 | Down  | 0.001152519 | 0.041839955 | 0.018238915 | 7  | 200 | 0.445676714 |
| c7 | EBV+ FK506+ vs. EBV+ FK506- | GSE30153_LUPUS_VS_HEALTHY_DONOR_BCELL_DN        | 110 | Down  | 0.001213439 | 0.042752568 | 0.077630905 | 3  | 200 | 0.712369661 |

|    |                                             |                                                                                                      |     |      |             |             |             |    |     |             |
|----|---------------------------------------------|------------------------------------------------------------------------------------------------------|-----|------|-------------|-------------|-------------|----|-----|-------------|
| c7 | EBV+ FK506+ vs. EBV+ FK506-                 | GSE22886_IGG_IGA_MEMORY_BCELL_VS_BM_PLASMA_CELL_DN                                                   | 152 | Down | 0.001357414 | 0.046738237 | 0.187173846 | 7  | 200 | 0.892294232 |
| c7 | EBV+ FK506+ vs. EBV+ FK506-                 | GSE22886_IGM_MEMORY_BCELL_VS_BM_PLASMA_CELL_DN                                                       | 157 | Down | 0.001425334 | 0.047986259 | 0.253725815 | 9  | 200 | 0.934838348 |
| c7 | EBV+ FK506+ vs. EBV+ FK506-                 | GSE10325_LUPUS_CD4_TCELL_VS_LUPUS_BCELL_UP                                                           | 172 | Down | 0.001478154 | 0.049217651 | 0.095154273 | 10 | 200 | 0.763051295 |
| h  | EBV+ FK506+ vs. (EBV+ FK506- & EBV- FK506+) | HALLMARK_INTERFERON_ALPHA_RESPONSE                                                                   | 92  | Up   | 4.24E-06    | 0.000641739 | 0.040228219 | 7  | 97  | 0.581832186 |
| h  | EBV+ FK506+ vs. (EBV+ FK506- & EBV- FK506+) | HALLMARK_MYC_TARGETS_V2                                                                              | 58  | Up   | 0.000279983 | 0.014883322 | 0.014510032 | 4  | 58  | 0.389074308 |
| h  | EBV+ FK506+ vs. (EBV+ FK506- & EBV- FK506+) | HALLMARK_CHOLESTEROL_HOMEOSTASIS                                                                     | 58  | Up   | 0.000840721 | 0.033518223 | 0.001140183 | 1  | 74  | 0.138190231 |
| c2 | EBV+ FK506+ vs. (EBV+ FK506- & EBV- FK506+) | TARTE_PLASMA_CELL_VS_B_LYMPHOCYTE_UP                                                                 | 72  | Down | 2.91E-05    | 0.003137071 | 0.331798512 | 2  | 78  | 0.959158425 |
| c2 | EBV+ FK506+ vs. (EBV+ FK506- & EBV- FK506+) | PID_MYC_ACTIV_PATHWAY                                                                                | 73  | Up   | 0.000177761 | 0.011487787 | 0.110605786 | 5  | 79  | 0.807396648 |
| c2 | EBV+ FK506+ vs. (EBV+ FK506- & EBV- FK506+) | ZHAN_MULTIPLE_MYELOMA_DN                                                                             | 24  | Down | 0.000207827 | 0.012625811 | 0.007990753 | 1  | 41  | 0.310410015 |
| c2 | EBV+ FK506+ vs. (EBV+ FK506- & EBV- FK506+) | SCHUHMACHER_MYC_TARGETS_UP                                                                           | 79  | Up   | 0.000208347 | 0.012625811 | 0.053316921 | 3  | 80  | 0.621587248 |
| c2 | EBV+ FK506+ vs. (EBV+ FK506- & EBV- FK506+) | PENG_LEUCINE_DEPRIVATION_DN                                                                          | 177 | Up   | 0.000325805 | 0.01702048  | 0.049648191 | 6  | 187 | 0.614570173 |
| c5 | EBV+ FK506+ vs. (EBV+ FK506- & EBV- FK506+) | GO_DEATH_RECEPTOR_ACTIVITY                                                                           | 17  | Up   | 0.000257058 | 0.014198926 | 0.002086315 | 0  | 24  | 0.176169164 |
| c5 | EBV+ FK506+ vs. (EBV+ FK506- & EBV- FK506+) | GO_NEGATIVE_REGULATION_OF_ENDOPLASMIC_RETICULUM_STRESS_INDUCED_INTRINSIC_APOPTOTIC_SIGNALING_PATHWAY | 15  | Down | 0.000446969 | 0.02220188  | 0.22831325  | 0  | 19  | 0.92692861  |
| c5 | EBV+ FK506+ vs. (EBV+ FK506- & EBV- FK506+) | GO_REGULATION_OF_ENDOPLASMIC_RETICULUM_STRESS_INDUCED_INTRINSIC_APOPTOTIC_SIGNALING_PATHWAY          | 25  | Down | 0.000459821 | 0.022471891 | 0.614485717 | 0  | 30  | 0.999416688 |
| c5 | EBV+ FK506+ vs. (EBV+ FK506- & EBV- FK506+) | GO_ISOTYPE_SWITCHING                                                                                 | 15  | Up   | 0.001245433 | 0.043375435 | 0.108872295 | 0  | 16  | 0.802430644 |
| c7 | EBV+ FK506+ vs. (EBV+ FK506- & EBV- FK506+) | GSE42724_NAIVE_BCELL_VS_PLASMABLAST_UP                                                               | 161 | Up   | 1.49E-06    | 0.000282732 | 0.000997395 | 9  | 199 | 0.128027494 |
| c7 | EBV+ FK506+ vs. (EBV+ FK506- & EBV- FK506+) | GSE12366_PLASMA_CELL_VS_NAIVE_BCELL_UP                                                               | 142 | Down | 6.03E-06    | 0.000870446 | 0.087604297 | 7  | 200 | 0.747600301 |
| c7 | EBV+ FK506+ vs. (EBV+ FK506- & EBV- FK506+) | GSE22886_IGM_MEMORY_BCELL_VS_BM_PLASMA_CELL_DN                                                       | 157 | Down | 1.55E-05    | 0.001946971 | 0.06802993  | 9  | 200 | 0.664937704 |
| c7 | EBV+ FK506+ vs. (EBV+ FK506- & EBV- FK506+) | GSE22886_NAIVE_BCELL_VS_BM_PLASMA_CELL_DN                                                            | 162 | Down | 1.61E-05    | 0.001946971 | 0.166203947 | 4  | 200 | 0.888949924 |
| c7 | EBV+ FK506+ vs. (EBV+ FK506- & EBV- FK506+) | GSE12366_PLASMA_CELL_VS_MEMORY_BCELL_UP                                                              | 137 | Down | 3.29E-05    | 0.003217248 | 0.341254563 | 5  | 200 | 0.959158425 |
| c7 | EBV+ FK506+ vs. (EBV+ FK506- & EBV- FK506+) | GSE10325_LUPUS_BCELL_VS_LUPUS_MYELOID_DN                                                             | 164 | Down | 4.23E-05    | 0.003657695 | 0.001481886 | 5  | 200 | 0.149670531 |
| c7 | EBV+ FK506+ vs. (EBV+ FK506- & EBV- FK506+) | GSE22886_IGG_IGA_MEMORY_BCELL_VS_BM_PLASMA_CELL_DN                                                   | 152 | Down | 0.000262422 | 0.014198926 | 0.082569384 | 7  | 200 | 0.733681038 |
| c7 | EBV+ FK506+ vs. (EBV+ FK506- & EBV- FK506+) | GSE3982_BCELL_VS_TH2_DN                                                                              | 133 | Up   | 0.000560133 | 0.026110811 | 0.115362516 | 6  | 200 | 0.811289041 |
| c7 | EBV+ FK506+ vs. (EBV+ FK506- & EBV- FK506+) | GSE22886_NAIVE_BCELL_VS_MONOCYTE_DN                                                                  | 183 | Down | 0.000659292 | 0.028951521 | 0.012190037 | 7  | 200 | 0.387059286 |
