# Supplementary material for: Immunosuppressive FK506 treatment leads to more frequent EBV-associated lymphoproliferative disease in humanized mice
Source: PubMed Central journal article supplement (PMC7162544; doi:10.1371/journal.ppat.1008477), 2020-04-06
Supplement: ppat.1008477.s004.pdf [file ppat.1008477.s004.pdf]

**S3 Table. PTLD patients' characteristics.**

| Summary      | Gender                | Number of subjects | Age (years)                       |                           |
|--------------|-----------------------|--------------------|-----------------------------------|---------------------------|
|              |                       |                    | Mean $\pm$ SD                     | Median [Range]            |
|              | F                     | 7                  | 2.29 $\pm$ 0.95                   | 2.42 [1.21 – 3.51]        |
|              | M                     | 6                  | 4.41 $\pm$ 4.31                   | 3.05 [0.75 – 12.6]        |
| <b>Total</b> | F:M ratio <b>1.17</b> | <b>13</b>          | <b>3.27 <math>\pm</math> 3.07</b> | <b>2.42 [0.75 – 12.6]</b> |

**Details**

| No. | Type of Transplant   | Type of PTLD                                                                | Acute Time-Point* | Recovery Time-Point* | Analysis    |
|-----|----------------------|-----------------------------------------------------------------------------|-------------------|----------------------|-------------|
| 1   | Liver                | IM-like PTLD                                                                | 0m                | 48m                  | <i>a, b</i> |
| 2   | Liver                | IM-like PTLD                                                                | 0.5m              | 36m                  | <i>a, b</i> |
| 3   | Liver                | PTLD, plasmacytic hyperplasia                                               | 0m                | 36m                  | <i>a, b</i> |
| 4   | Liver                | Monomorphic PTLD                                                            | 0.25m             | 48m                  | <i>a, b</i> |
| 5   | Liver                | IM-like PTLD                                                                | 0.25m             | 45m                  | <i>a, b</i> |
| 6   | Liver                | IM-like PTLD                                                                | 0m                | 42m                  | <i>a, b</i> |
| 7   | Liver                | Monomorphic PTLD (Burkitt lymphoma)                                         | 0m                | 45m                  | <i>a, b</i> |
| 8   | Liver and stem cells | Atypical PTLD; lymphoid infiltrate with a majority of EBER+ CD3+ CD8+ cells | 0m                | 45m                  | <i>a, b</i> |
| 9   | Liver                | IM-like PTLD                                                                | 0.25m             | 48m                  | <i>a</i>    |
| 10  | Liver                | IM-like PTLD                                                                | 0m                | 36m                  | <i>a</i>    |
| 11  | Liver                | IM-like PTLD                                                                | 1m                | 36m                  | <i>a</i>    |
| 12  | Liver                | IM-like PTLD                                                                | 3m                | 42m                  | <i>a</i>    |
| 13  | Liver                | IM-like PTLD                                                                | 2m                | 42m                  | <i>a</i>    |

\* months post diagnosis

*a* sCD30 serum concentration

*b* PRR4 and cytokine serum concentration
