# Supplementary material for: Immunosuppressive FK506 treatment leads to more frequent EBV-associated lymphoproliferative disease in humanized mice
Source: PubMed Central journal article supplement (PMC7162544; doi:10.1371/journal.ppat.1008477), 2020-04-06
Supplement: ppat.1008477.s005.pdf [file ppat.1008477.s005.pdf]

**S4 Table. Control subjects' characteristics.**

| Cohort                 | Gender                | Number of subjects | Age (years)                       |                            | % EBV VCA-IgG seropositive |
|------------------------|-----------------------|--------------------|-----------------------------------|----------------------------|----------------------------|
|                        |                       |                    | Mean $\pm$ SD                     | Median [Range]             |                            |
| <b>Tonsillectomy</b>   | F:M ratio <b>1.07</b> | <b>31</b>          | <b>3.92 <math>\pm</math> 2.96</b> | <b>3.12 [0.94 – 12.85]</b> | <b>51.6%</b>               |
|                        | F                     | 16                 | 3.19 $\pm$ 0.68                   | 3.19 [2.07 – 4.51]         | 50%                        |
|                        | M                     | 15                 | 4.71 $\pm$ 4.13                   | 3.04 [0.94 – 12.85]        | 53.3%                      |
| <b>Febrile non-EBV</b> | F:M ratio <b>1.33</b> | <b>21</b>          | <b>3.15 <math>\pm</math> 2.51</b> | <b>2.64 [0.33 – 12.67]</b> | <b>52.4%*</b>              |
|                        | F                     | 12                 | 2.44 $\pm$ 0.86                   | 2.38 [1 – 3.75]            | 50%                        |
|                        | M                     | 9                  | 4.11 $\pm$ 3.59                   | 3.00 [0.33 – 12.67]        | 55.6%                      |
| Total                  | F:M ratio <b>1.17</b> | <b>52</b>          | <b>3.61 <math>\pm</math> 2.79</b> | <b>2.99 [0.33 – 12.85]</b> | <b>51.9%</b>               |

\* all subjects were tested negative for EBV VCA-IgM
